# Supplementary material for: Double network hydrogels with highly enhanced toughness based on a modified first network
Source: Royal Society of Chemistry journal article supplement (doi:10.1039/c7sm00544j), 2017-01-01
Supplement: c7sm00544j1.pdf [file c7sm00544j1.pdf]

## Supporting Information

### Double Network Hydrogels with Highly Enhanced Toughness Based on a Modified First Network

Jun Liang, Guorong Shan\*, Pengju Pan

*State Key Laboratory of Chemical Engineering, College of Chemical and Biological Engineering, Zhejiang University, 38 Zheda Road, Hangzhou 310027, China*

\*Corresponding author: shangr@zju.edu.cn

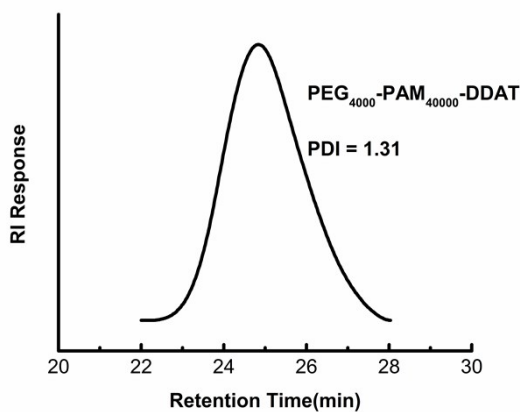

**Figure S1.** GPC trace of PEG<sub>4000</sub>-PAM<sub>40000</sub>-DDAT macro-RAFT agent.

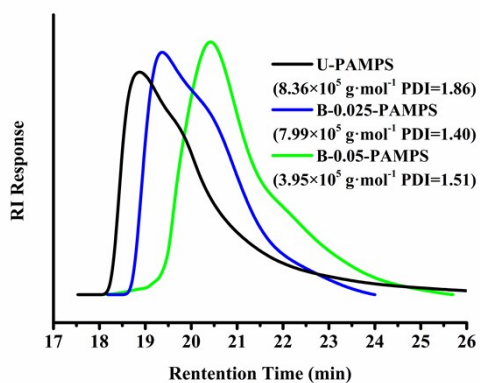

**Figure S2.** GPC trace of U-PAMPS, B-0.1-PAMPS and B-0.025-PAMPS.

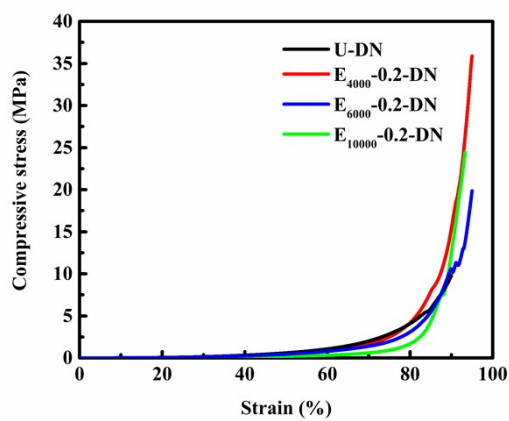

**Figure S3.** Compressive stress–strain curves of first-network PEG-DDAT-modified DN hydrogels with different molecule weight of PEG.

**Table S1.** Compressive Properties of First-Network-Modified DN Hydrogels

| DN hydrogel                                 | Compressive modulus (MPa) | Compressive stress (MPa) | Strain at break (%) |
|---------------------------------------------|---------------------------|--------------------------|---------------------|
| U-DN                                        | 0.173                     | 12.65                    | 85.5                |
| E <sub>4000</sub> -0.1-DN                   | 0.247                     | 16.93                    | 90.0                |
| E <sub>4000</sub> -0.2-DN                   | 0.156                     | 35.90                    | 95.0                |
| E <sub>4000</sub> -0.4-DN                   | 0.143                     | 20.23                    | 95.0                |
| E <sub>6000</sub> -0.2-DN                   | 0.140                     | 19.86                    | 90.0                |
| E <sub>10000</sub> -0.2-DN                  | 0.048                     | 24.47                    | 92.5                |
| E <sub>4000</sub> A <sub>2000</sub> -0.2-DN | 0.142                     | 13.50                    | 92.5                |

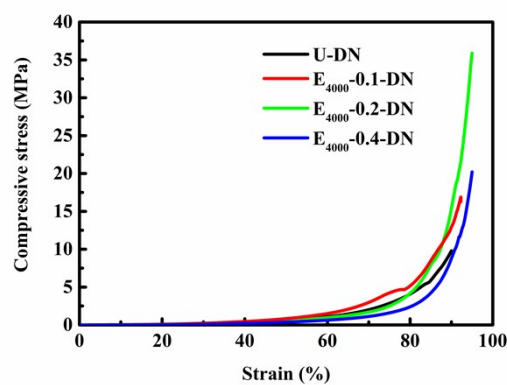

**Figure S4.** Compressive stress–strain curves of first-network PEG<sub>4000</sub>-DDAT-modified DN hydrogels with different PEG<sub>4000</sub>-DDAT concentrations.

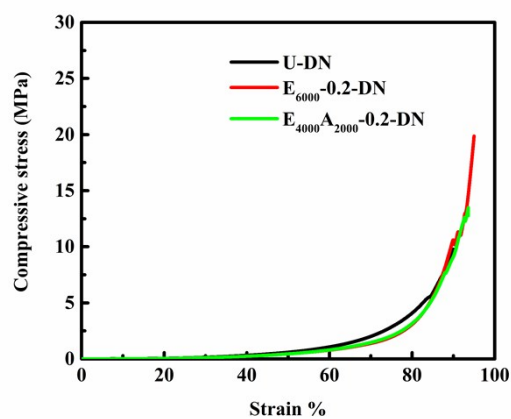

**Figure S5.** Compressive stress–strain curves of first-network PEG-PAM-DDAT-modified DN hydrogel, E<sub>4000</sub>A<sub>2000</sub>-0.2-DN with U-DN and E<sub>6000</sub>-0.2-DN hydrogels as control groups.
